# Supplementary material for: Proteomic Profiling of Autophagosome Cargo in Saccharomyces cerevisiae
Source: PLoS One. 2014 Mar 13;9(3):e91651. doi: 10.1371/journal.pone.0091651 (PMC3953483; doi:10.1371/journal.pone.0091651)
Supplement: Table S5 — Principal component analysis for Figure S2 (186 proteins; PC2 scores in Table S4> = 0). (XLSX) [file pone.0091651.s008.xlsx]

## Sheet: Table S5
Table S5. Principal component analysis for Figure S2 (186 proteins; PC2 scores in Table S4 >= 0)
Protein name	Localization	Gene name	1st_ypt7Datg11D_AP	1st_ypt7Datg1D_AP	1st_ypt7D_AP	2nd_ypt7Datg11D_AP	2nd_ypt7Datg1D_AP	2nd_ypt7D_AP	3rd_ypt7Datg11D_AP	3rd_ypt7Datg1D_AP	3rd_ypt7D_AP	PC1 score	1st_ypt7Datg11D_AP	1st_ypt7Datg1D_AP	1st_ypt7D_AP	2nd_ypt7Datg11D_AP	2nd_ypt7Datg1D_AP	2nd_ypt7D_AP	3rd_ypt7Datg11D_AP	3rd_ypt7Datg1D_AP	3rd_ypt7D_AP	PC2 score
Glyceraldehyde-3-phosphate dehydrogenase 3	Cytoplasm	TDH3	384	92	195	268	95	137	420	187	372	795.964	40.6074	-16.2663	-32.2828	-20.453	-33.2574	-63.7021	20.1954	22.0127	18.0769	-96.7168
Enolase 2	Cytoplasm	ENO2	197	85	150	176	89	139	239	96	179	472.091	-6.66825	20.7866	15.1972	4.91677	12.9298	19.9623	1.87347	-1.85495	-30.9139	29.2635
Pyruvate kinase 1	Cytoplasm	PYK1	155	45	104	133	51	107	193	66	178	375.853	-7.14932	-6.12314	-3.32247	-3.20694	-9.56289	12.2288	4.21306	-11.9067	10.8782	6.57272
Fructose-bisphosphate aldolase	Cytoplasm	FBA1	111	29	58	83	37	50	104	30	76	209.291	20.7082	0.53241	-1.76183	7.15404	3.27594	-2.7727	-1.12479	-13.3818	-17.0607	-4.13053
Elongation factor 2	Cytoplasm	EFT1	111	12	79	133	27	86	126	8	105	257.946	-0.282325	-23.0856	5.34509	39.5218	-14.564	20.959	-3.5636	-45.467	-9.6949	30.0368
Pyruvate decarboxylase isozyme 1	Cytoplasm	PDC1	107	56	98	121	79	99	143	69	160	320.577	-31.3025	12.3954	6.46111	4.82459	27.3439	18.1665	-18.0226	2.55083	17.4563	40.3294
Elongation factor 3A	Cytoplasm	YEF3	99	17	89	114	49	101	133	39	114	270.69	-17.7802	-19.819	11.7062	15.9035	5.38251	32.7457	-2.96466	-17.1085	-6.36138	41.1567
Phosphoglycerate kinase	Cytoplasm	PGK1	98	46	85	96	50	80	116	35	81	237.362	-4.40214	13.7142	17.2227	9.98125	11.7527	20.1492	-3.22459	-14.2004	-24.5424	33.0766
Elongation factor 1-alpha	Cytoplasm	TEF1	108	50	92	94	57	79	169	61	140	302.615	-22.5533	8.83859	5.59011	-15.666	8.23824	2.69571	16.9996	-1.72597	5.44314	6.63941
ATP-dependent molecular chaperone HSC82	Cytoplasm	HSC82	71	14	66	74	21	69	78	22	67	172.51	-3.42383	-9.46467	16.7408	11.4833	-6.79736	25.5016	-8.65005	-13.7579	-9.70611	30.3592
Fatty acid synthase subunit beta	Cytoplasm	FAS1	53	0	31	37	0	36	33	0	34	85.8965	15.9428	-11.6836	6.47279	5.8716	-13.8409	14.3412	-10.1449	-17.8046	-4.1936	9.26176
Magnesium-activated aldehyde dehydrogenase, cytosolic	Cytoplasm	ALD6	42	4	44	62	20	53	67	7	80	140.959	-18.812	-15.1731	3.75011	10.9174	-2.71332	17.4573	-3.80207	-22.2179	17.3232	25.5433
Alcohol dehydrogenase 1	Cytoplasm	ADH1	73	31	63	73	39	68	81	50	76	188.427	-8.29066	5.37033	9.1958	4.71509	8.63788	20.4882	-13.645	10.9429	-7.78352	26.6791
Fatty acid synthase subunit alpha	Cytoplasm	FAS2	27	2	24	57	1	30	38	5	21	76.6164	-6.05363	-8.42129	2.12265	29.2346	-11.3456	10.6812	-0.48363	-10.881	-13.0673	16.46
60S ribosomal protein L3	Cytoplasm	RPL3	34	0	14	32	1	15	22	1	15	52.1331	11.5089	-7.0911	-0.886298	13.1072	-7.40045	1.85465	-4.18593	-9.80614	-8.18084	0.598316
60S ribosomal protein L8-B	Cytoplasm	RPL8B	35	0	21	44	1	21	52	0	24	79.2882	0.793711	-10.7847	-1.64026	15.2664	-11.7761	1.00751	12.1744	-16.4348	-11.2553	-0.616065
6-phosphofructokinase subunit beta	Cytoplasm	PFK2	21	0	16	24	1	9	38	1	37	60.5026	-5.10186	-8.22951	-1.27615	2.07419	-8.74906	-6.25571	7.61017	-11.541	10.0977	-5.88767
Heat shock protein SSA2	Cytoplasm	SSA2	90	38	90	88	59	85	96	68	133	253.978	-19.5706	3.45411	17.478	-4.04033	18.0753	20.9594	-31.5707	15.3554	20.0693	37.6768
Actin	Cytoplasm	ACT1	7	3	6	10	6	9	6	4	11	20.7353	-1.94556	0.179604	0.0791602	2.48564	2.65882	3.7716	-4.41513	-0.298008	1.78011	5.96924
6-phosphofructokinase subunit alpha	Cytoplasm	PFK1	20	1	17	30	2	29	26	0	24	55.8561	-4.09727	-6.59749	1.05064	9.75807	-7.00035	14.9159	-2.05593	-11.5778	-0.836236	14.8881
60S ribosomal protein L5	Cytoplasm	RPL5	39	9	28	41	11	33	43	4	22	83.206	3.10349	-2.31761	4.24102	10.8466	-2.40737	12.0196	1.20648	-13.2469	-14.9973	13.1309
Heat shock protein SSB1	Cytoplasm	SSB1	90	51	75	102	62	92	94	51	95	237.361	-12.4014	18.7144	7.22315	15.9819	23.753	32.1496	-25.2237	1.79998	-10.5416	48.8302
ATP-dependent RNA helicase eIF4A	Cytoplasm	TIF1	38	10	28	51	12	35	37	4	40	92.1899	-1.77231	-2.53958	1.67573	17.5909	-2.85499	11.7543	-9.30603	-15.1091	-0.991963	18.2724
Adenosylhomocysteinase	Cytoplasm	SAH1	26	2	16	10	0	18	16	1	12	37.7999	9.69248	-3.1415	5.20647	-3.69847	-6.09087	8.46877	-2.98649	-6.83515	-4.8076	3.52138
V-type proton ATPase catalytic subunit A	Cytoplasm	TFP1	19	2	8	10	3	8	19	4	15	33.9202	4.36626	-2.61379	-1.6857	-2.29248	-2.46571	-0.55296	1.96225	-3.03096	-0.0825005	-4.09499
Glucose-6-phosphate isomerase	Cytoplasm	PGI1	35	13	34	45	21	45	42	19	41	100.88	-8.52119	-0.721549	5.19444	8.44179	4.7448	19.5632	-8.67078	-1.9103	-3.85581	24.82
40S ribosomal protein S4	Cytoplasm	RPS4A	28	2	26	34	4	25	34	2	19	64.9862	-0.0361679	-6.83936	7.44358	10.4494	-6.47153	8.61375	1.3581	-11.4703	-9.89592	10.9179
Triosephosphate isomerase	Cytoplasm	TPI1	37	17	34	39	16	35	47	19	41	99.2965	-5.83818	3.49379	5.64651	3.01553	-9.29624e-05	9.96244	-2.87557	-1.58214	-3.15186	13.3827
Phosphoglycerate mutase 1	Cytoplasm	GPM1	32	14	30	43	16	24	41	11	29	84.2573	-4.35005	2.5394	5.94084	12.4656	2.42323	2.75455	-1.32157	-6.46483	-8.46476	11.5318
40S ribosomal protein S3	Cytoplasm	RPS3	37	6	24	39	9	28	40	7	33	82.4913	1.41187	-5.22038	0.445127	9.10564	-4.29219	7.19986	-1.43449	-10.0988	-3.67948	7.6399
Guanine nucleotide-binding protein subunit beta-like protein	Cytoplasm	ASC1	40	8	30	46	18	43	35	13	34	92.7169	0.000347884	-4.61126	3.52526	12.3999	3.0601	19.6215	-11.5707	-6.21833	-7.22628	23.0055
NADP-specific glutamate dehydrogenase 1	Cytoplasm	GDH1	3	0	12	11	0	18	11	0	29	31.6658	-10.6611	-4.30714	2.95804	-0.475489	-5.10245	10.0155	-4.90537	-6.56367	14.9199	12.1388
Vacuolar aminopeptidase 1	Cytoplasm	APE1	3	0	54	4	0	53	1	0	72	64.044	-24.6297	-8.7112	35.7126	-19.2092	-10.3197	36.8513	-31.1686	-13.275	43.523	48.8219
Glyceraldehyde-3-phosphate dehydrogenase 2	Cytoplasm	TDH2	17	10	15	21	15	24	28	11	25	56.5167	-7.38226	2.31266	-1.13799	0.518675	5.89321	9.74934	-0.387736	-0.714761	-0.129965	11.2504
Protein BMH1	Cytoplasm	BMH1	18	11	13	26	14	24	27	9	17	53.6898	-5.16271	3.69716	-2.33081	6.54311	5.34871	10.4621	0.0321554	-2.12881	-6.87302	12.3624
40S ribosomal protein S5	Cytoplasm	RPS5	22	4	17	17	8	14	23	5	16	45.5728	2.33913	-2.19876	3.98697	0.484684	0.656649	2.50884	0.109272	-4.44631	-4.26379	3.31116
60S ribosomal protein L7-A	Cytoplasm	RPL7A	28	1	20	29	3	19	31	3	19	58.3514	2.82623	-6.93689	3.33813	7.8538	-6.40242	4.28673	1.69073	-9.09505	-6.94575	4.12149
Heat shock protein homolog SSE1	Cytoplasm	SSE1	24	2	22	18	9	19	27	12	27	57.7268	-0.904325	-5.85194	5.51647	-2.91987	-0.301784	4.44421	-1.99557	0.034406	1.33196	4.51689
40S ribosomal protein S1-B	Cytoplasm	RPS1B	20	0	16	26	0	17	25	0	10	43.9095	1.05667	-5.97253	3.4619	10.0874	-7.07535	5.92823	2.9447	-9.10156	-9.52424	6.15943
Serine hydroxymethyltransferase, cytosolic	Cytoplasm	SHM2	4	0	2	10	2	13	17	0	15	24.7295	-6.66874	-3.36369	-5.06137	1.03816	-1.98478	6.76446	4.57861	-5.12593	4.00409	4.2426
60S ribosomal protein L10	Cytoplasm	RPL10	16	0	16	18	4	13	24	4	17	42.36	-2.27483	-5.76177	3.90436	2.64897	-2.82566	2.31894	2.72301	-4.78037	-1.83525	3.36015
Isoleucyl-tRNA synthetase, cytoplasmic	Cytoplasm	ILS1	14	0	8	5	0	4	6	0	3	15.4924	7.3163	-2.10727	3.57623	-0.614371	-2.49637	0.093588	-1.78169	-3.21127	-3.88866	-1.16673
5-methyltetrahydropteroyltriglutamate--homocysteine methyltransferase	Cytoplasm	MET6	16	3	12	22	9	28	19	0	22	46.5461	-4.08076	-3.33115	-1.29094	5.13197	1.49982	16.2634	-4.3796	-9.64805	1.30344	16.6472
60S ribosomal protein L2	Cytoplasm	RPL2A	17	4	20	22	11	23	29	12	21	55.525	-6.95442	-3.55245	4.14518	1.87806	2.05301	8.9994	1.11039	0.4908	-3.68901	10.6755
60S ribosomal protein L4-A	Cytoplasm	RPL4A	44	4	35	48	5	30	49	3	32	94.7483	3.12398	-8.88757	7.94521	13.6638	-10.2672	6.10926	1.40894	-16.6394	-10.1295	8.73446
40S ribosomal protein S18	Cytoplasm	RPS18A	20	4	18	24	3	20	24	3	12	46.5486	-0.0818654	-2.3315	4.70833	7.13105	-4.50059	8.26278	0.619119	-6.64858	-8.6977	9.12371
Glutamyl-tRNA synthetase, cytoplasmic	Cytoplasm	GUS1	21	0	12	22	1	19	21	0	17	43.518	2.22559	-5.91928	-0.426301	6.22932	-6.01226	8.02695	-0.858641	-9.0204	-2.35015	5.9352
Glucokinase-1	Cytoplasm	GLK1	5	0	3	13	0	9	8	0	4	15.7911	-1.81255	-2.14789	-1.50905	7.2774	-2.54449	5.01828	0.0682999	-3.27317	-3.02146	5.22391
60S ribosomal protein L9-B	Cytoplasm	RPL9B	20	2	15	19	5	14	24	3	19	45.5299	0.357637	-4.19293	1.99922	2.50023	-2.33644	2.51966	1.13082	-6.43742	-1.24471	2.82732
40S ribosomal protein S2	Cytoplasm	RPS2	18	2	13	18	5	16	22	0	17	41.7221	0.000356175	-3.67501	1.0865	2.88013	-1.72288	5.47978	1.0434	-8.64815	-1.55162	5.432
Eukaryotic translation initiation factor 5A-2	Cytoplasm	HYP2	22	4	21	24	7	22	28	3	14	52.3154	-0.569742	-3.11589	6.06167	5.04121	-1.42982	8.8087	1.72254	-7.84391	-9.26186	10.3149
3-isopropylmalate dehydratase	Cytoplasm	LEU1	0	0	3	0	0	6	0	0	11	7.26064	-3.13237	-0.987586	0.926768	-2.63122	-1.16994	4.16923	-3.64695	-1.50498	7.77158	4.36117
40S ribosomal protein S12	Cytoplasm	RPS12	32	2	19	9	2	21	9	3	14	39.7492	14.8515	-3.40664	7.64987	-5.40488	-4.40497	10.9773	-10.9656	-5.2392	-3.67435	6.15868
Enolase 1	Cytoplasm	ENO1	12	1	6	10	0	6	3	0	5	15.8932	5.14339	-1.16178	1.46179	4.24038	-2.56095	1.99253	-4.983	-3.29434	-2.06687	2.35842
6-phosphogluconate dehydrogenase, decarboxylating 1	Cytoplasm	GND1	22	6	18	24	10	19	21	8	30	56.0925	-2.19924	-1.62964	1.98314	3.67241	0.961566	4.85631	-7.17465	-3.62683	5.05867	8.45534
Glycyl-tRNA synthetase 1	Cytoplasm	GRS1	12	7	12	19	4	12	21	2	23	41.301	-5.81796	1.38228	0.206751	4.03275	-2.65502	1.58597	0.254938	-6.56086	4.63564	4.74737
60S ribosomal protein L12	Cytoplasm	RPL12A	14	2	9	27	4	21	24	3	21	46.6205	-6.11286	-4.34127	-4.31219	10.105	-3.51217	9.24467	0.583028	-6.66348	0.270355	9.34382
Cystathionine beta-synthase	Cytoplasm	CYS4	12	0	6	31	5	16	32	2	17	47.0114	-8.28151	-6.39444	-7.42381	13.9633	-2.57516	4.1461	8.38668	-7.7445	-3.90346	4.6484
Hexokinase-2	Cytoplasm	HXK2	16	7	17	30	16	20	26	6	33	60.1786	-9.96206	-1.18543	-0.183623	8.19162	6.30315	4.82599	-4.22707	-6.4738	6.24178	12.8002
60S acidic ribosomal protein P0	Cytoplasm	RPP0	13	4	15	24	7	20	20	1	14	41.7822	-5.02554	-1.68317	3.06936	8.85838	0.267446	9.46464	-0.98675	-7.6606	-4.57831	13.4887
Leucyl-tRNA synthetase, cytoplasmic	Cytoplasm	CDC60	9	0	6	16	0	11	4	1	8	19.9416	0.396861	-2.71243	0.305803	8.77328	-3.21328	5.97174	-6.01645	-3.13349	-0.866962	7.49434
60S ribosomal protein L27-A	Cytoplasm	RPL27A	19	3	13	15	4	14	20	3	17	40.1542	1.67678	-2.46174	1.53421	0.448337	-2.47023	3.87513	-0.169045	-5.32316	-0.854449	2.87481
Importin subunit beta-4	Cytoplasm	KAP123	9	0	2	13	0	13	9	0	5	19.1868	0.722508	-2.60976	-3.47866	6.04683	-3.09165	8.16207	-0.637304	-3.97702	-3.53133	5.59679
Aspartyl-tRNA synthetase, cytoplasmic	Cytoplasm	DPS1	9	0	7	12	0	13	16	0	7	24.6574	-1.63762	-3.35388	-0.0407683	3.0643	-3.97316	6.78265	3.61485	-5.11098	-3.96383	4.70049
40S ribosomal protein S7-A	Cytoplasm	RPS7A	16	2	9	24	6	18	26	5	20	46.9364	-4.24918	-4.38425	-4.40241	6.9905	-1.56308	6.165	2.42432	-4.72897	-0.870137	5.3841
60S ribosomal protein L1	Cytoplasm	RPL1A	12	0	7	12	0	13	18	0	7	26.9562	0.370624	-3.66656	-0.697185	2.23122	-4.34358	6.203	4.46017	-5.58748	-4.986	2.86152
40S ribosomal protein S16	Cytoplasm	RPS16A	19	4	9	21	4	15	21	4	15	41.3949	1.14155	-1.63049	-2.82005	5.99874	-2.67014	4.5623	0.207797	-4.58031	-3.40609	3.25291
Bifunctional purine biosynthetic protein ADE5,7	Cytoplasm	ADE5,7	9	0	3	4	0	3	6	3	15	17.2507	1.55776	-2.34642	-1.92583	-2.25155	-2.77968	-1.34975	-2.66484	-0.575718	7.32954	-3.11755
Inorganic pyrophosphatase	Cytoplasm	IPP1	6	2	4	13	2	9	13	0	8	21.3924	-3.22904	-0.909773	-2.10847	5.24752	-1.44705	3.60592	2.25482	-4.43421	-1.51206	4.00319
Ribosome-associated complex subunit SSZ1	Cytoplasm	SSZ1	19	0	7	19	0	11	34	0	23	47.1596	-1.34545	-6.4146	-6.46613	1.90963	-7.59904	-0.891272	10.3122	-9.77523	2.03064	-5.81966
60S ribosomal protein L6-A	Cytoplasm	RPL6A	16	2	12	16	0	12	4	0	11	26.3256	4.64268	-1.58078	4.48288	6.45975	-4.24197	5.36201	-9.22308	-5.45677	-0.705602	7.58376
Mannose-1-phosphate guanyltransferase	Cytoplasm	MPG1	9	8	12	25	6	19	19	4	19	42.0358	-9.13498	2.28232	-0.00307861	9.76645	-0.773429	8.40068	-2.11417	-4.71318	0.308892	13.1245
Elongation factor 1-gamma 2	Cytoplasm	TEF4	8	6	18	27	3	23	20	3	27	48.1478	-12.7718	-0.54902	4.25168	9.5515	-4.75828	10.8595	-4.18415	-6.98007	5.59122	17.1293
Acetyl-CoA carboxylase	Cytoplasm	FAS3	10	0	1	12	0	8	12	5	12	23.3653	-0.0801787	-3.17812	-5.67181	3.53256	-3.76495	2.10845	0.263866	0.156852	1.6107	-1.13315
Ubiquitin-activating enzyme E1 1	Cytoplasm	UBA1	0	0	4	3	0	1	4	0	4	6.26925	-2.70466	-0.852738	2.20985	0.728058	-1.01019	-0.58079	0.85102	-1.29949	1.2124	1.17913
60S ribosomal protein L15-A	Cytoplasm	RPL15A	16	0	12	17	2	15	12	0	12	31.9577	2.21292	-4.34685	2.87469	5.41873	-3.14948	6.94189	-4.05199	-6.62417	-2.20987	7.55429
Heat shock protein 104	Cytoplasm	HSP104	4	0	2	7	2	3	5	0	7	11.5362	-0.976917	-1.56914	-1.29409	2.81934	0.141118	0.0911492	-0.794517	-2.39122	1.87046	1.16439
UTP--glucose-1-phosphate uridylyltransferase	Cytoplasm	UGP1	4	0	4	10	0	6	8	0	8	15.5802	-2.72155	-2.1192	-0.448823	4.35383	-2.51051	2.07146	0.174242	-3.22945	1.07232	3.00669
Ribonucleoside-diphosphate reductase small chain 2	Cytoplasm	RNR4	2	1	2	2	0	2	0	0	2	3.68832	0.408795	0.498318	0.946822	0.663373	-0.594316	1.06999	-1.85261	-0.764514	0.359999	1.63989
60S ribosomal protein L11-A	Cytoplasm	RPL11A	12	3	6	17	3	11	12	3	10	27.8119	0.00149026	-0.782942	-1.94151	6.92114	-1.48145	3.98725	-1.9696	-2.76483	-2.36646	4.47838
60S ribosomal protein L36-B	Cytoplasm	RPL36B	14	0	10	15	0	11	11	0	10	27.0765	2.31874	-3.68292	2.26847	5.18763	-4.36296	4.17267	-2.60024	-5.61241	-2.03948	4.45794
60S ribosomal protein L17-B	Cytoplasm	RPL17B	15	0	10	17	3	12	17	0	10	31.982	1.20243	-4.35016	0.86774	5.40991	-2.1534	3.93575	0.935784	-6.62922	-4.22069	4.04363
Seryl-tRNA synthetase, cytoplasmic	Cytoplasm	SES1	14	0	11	17	3	17	21	1	20	39.7598	-3.15304	-5.40808	-0.353157	2.59129	-3.40667	6.97459	1.02909	-7.24139	2.32094	6.04061
60S ribosomal protein L16-B	Cytoplasm	RPL16B	9	0	12	14	0	10	7	0	2	19.3096	0.669503	-2.62648	6.48626	7.0023	-3.11145	5.13109	-2.69902	-4.00249	-6.58596	8.01916
60S ribosomal protein L20	Cytoplasm	RPL20A	16	1	7	16	2	15	18	0	14	34.2066	1.2427	-3.65275	-2.76748	3.60373	-3.51186	6.37482	0.81839	-7.09033	-1.20985	3.67775
Adenylosuccinate lyase	Cytoplasm	ADE13	5	0	3	5	0	4	1	0	1	6.78122	2.07446	-0.922375	1.06366	2.54252	-1.09269	2.29012	-2.40614	-1.40561	-2.01525	2.46387
40S ribosomal protein S6	Cytoplasm	RPS6A	18	4	12	23	7	17	18	2	13	40.7218	0.431903	-1.53895	0.372128	8.24263	0.438303	6.732	-2.45415	-6.44081	-5.10684	8.7276
Farnesyl pyrophosphate synthetase	Cytoplasm	FPP1	16	0	13	2	0	9	4	0	8	19.1752	7.72749	-2.60819	7.52464	-4.94899	-3.08979	4.16498	-5.63151	-3.97463	-0.526197	2.73537
40S ribosomal protein S19-A	Cytoplasm	RPS19A	12	1	8	23	7	15	22	0	11	36.7841	-3.86929	-4.00334	-2.50348	9.66965	1.07281	5.7249	3.52373	-7.6246	-5.35594	7.40988
Tyrosyl-tRNA synthetase, cytoplasmic	Cytoplasm	TYS1	6	0	3	9	0	3	11	0	4	14.7669	-0.370694	-2.00858	-1.2166	3.64856	-2.37946	-0.723469	3.58274	-3.06088	-2.56606	-1.08513
60S ribosomal protein L19	Cytoplasm	RPL19A	14	0	9	21	1	12	17	0	3	29.2798	1.36819	-3.98261	0.639331	10.3892	-3.71799	4.61711	2.29306	-6.06911	-10.0192	4.94118
Threonine synthase	Cytoplasm	THR4	10	1	5	8	3	6	6	3	7	17.5215	2.44094	-1.38325	-0.00314776	1.65032	0.176685	1.58197	-2.80085	-0.631845	-0.790866	1.45807
60S ribosomal protein L28	Cytoplasm	RPL28	8	0	6	8	2	5	7	0	6	15.8307	1.17038	-2.15327	1.47965	2.26305	-0.55087	1.0083	-0.951584	-3.28138	-1.03906	1.91808
60S ribosomal protein L26-B	Cytoplasm	RPL26B	14	0	8	22	0	18	19	0	10	34.8255	-1.02433	-4.73693	-1.94422	9.37943	-5.6116	9.21876	1.5075	-7.21862	-5.48506	7.53119
60S ribosomal protein L14-A	Cytoplasm	RPL14A	12	6	11	21	1	19	16	2	15	36.8173	-3.88359	0.992153	0.48706	7.65764	-4.93253	9.71654	-2.49292	-5.63147	-1.37068	10.8208
Heat shock protein SSA1	Cytoplasm	SSA1	22	7	18	20	11	16	22	15	30	56.1368	-2.21838	-0.635677	1.97047	-0.343668	1.95442	1.84512	-6.19694	3.36398	5.03894	4.15987
40S ribosomal protein S17-A	Cytoplasm	RPS17A	16	0	10	16	0	11	15	0	3	27.1983	4.26617	-3.69949	2.23368	6.14347	-4.38259	4.14195	1.33855	-5.63767	-9.09366	3.0508
60S ribosomal protein L35	Cytoplasm	RPL35A	10	0	9	17	0	15	13	0	4	25.1354	-0.843824	-3.41889	1.82275	7.89109	-4.05018	8.66213	0.374771	-5.21005	-7.17636	8.60961
40S ribosomal protein S22-A	Cytoplasm	RPS22A	13	0	11	15	0	12	10	0	8	25.7912	1.87324	-3.50809	3.63549	5.65342	-4.15585	5.49676	-2.95464	-5.34599	-3.46797	6.31644
40S ribosomal protein S9-B	Cytoplasm	RPS9B	15	0	10	12	0	7	12	0	9	25.4698	4.01191	-3.46437	2.72726	2.7699	-4.10406	0.577808	-0.793197	-5.27937	-2.32505	0.425592
Asparaginyl-tRNA synthetase, cytoplasmic	Cytoplasm	DED81	6	0	9	15	0	4	11	1	7	20.4479	-2.82157	-2.7813	3.16123	7.5898	-3.29486	-1.15593	0.729233	-3.23844	-2.0921	2.59533
40S ribosomal protein S25-A	Cytoplasm	RPS25A	5	2	6	18	0	10	6	0	7	19.3132	-3.33206	-0.626969	0.485221	11.001	-3.11203	5.13017	-3.70084	-4.00324	-1.58757	8.67365
60S ribosomal protein L25	Cytoplasm	RPL25	15	4	9	13	3	8	12	1	7	26.1442	3.72093	0.443887	1.53467	3.52548	-1.21274	1.40774	-1.13197	-4.41917	-4.62495	2.03975
60S ribosomal protein L31-B	Cytoplasm	RPL31B	9	0	1	7	0	10	2	0	3	11.5651	4.01063	-1.57307	-2.30234	2.80888	-1.86353	7.08387	-3.80901	-2.3972	-2.14237	4.23642
40S ribosomal protein S24	Cytoplasm	RPS24A	17	0	12	11	0	11	20	0	11	32.4575	2.99728	-4.41484	2.73196	-0.762416	-5.23003	2.81585	3.69694	-6.72778	-3.43213	0.0881767
Eukaryotic translation initiation factor 3 subunit C	Cytoplasm	NIP1	9	1	6	12	0	6	6	0	9	18.6092	0.971664	-1.53121	0.68625	5.25612	-2.99859	1.30769	-3.34722	-3.85731	0.725467	2.80137
Probable inosine-5'-monophosphate dehydrogenase IMD3	Cytoplasm	IMD3	6	0	3	5	0	6	7	0	4	12.0646	0.795119	-1.64102	-0.444977	0.627851	-1.94403	2.95791	0.94007	-2.50075	-1.36449	1.30453
40S ribosomal protein S15	Cytoplasm	RPS15	12	0	2	22	2	15	22	1	8	32.6401	-2.0815	-4.43968	-7.32018	10.1714	-3.25945	6.76981	5.60522	-5.76563	-6.51332	3.76379
ADP-ribosylation factor 1	Cytoplasm	ARF1	1	0	2	0	0	3	1	1	1	2.91317	-0.256791	-0.396246	1.16816	-1.05572	-0.469412	2.26545	-0.463255	0.396159	-0.295332	1.7167
Protein MET17	Cytoplasm	MET17	9	0	8	26	7	12	20	9	25	42.7706	-9.45195	-5.81761	-4.21287	10.5002	0.108182	1.21542	-1.48321	0.134529	5.9822	5.14594
40S ribosomal protein S14-A	Cytoplasm	RPS14A	19	2	12	16	2	8	15	0	9	31.5694	5.38041	-2.29404	2.98554	4.55942	-3.08693	0.039781	-0.856992	-6.5437	-5.03725	0.818249
Asparagine synthetase [glutamine-hydrolyzing] 1	Cytoplasm	ASN1	5	0	7	9	0	4	13	2	10	19.8168	-3.54932	-2.69547	1.34143	1.81849	-3.19318	-0.996806	3.04621	-2.10763	1.18851	-0.0731452
Aspartate-semialdehyde dehydrogenase	Cytoplasm	HOM2	2	0	3	2	0	3	6	0	6	8.88232	-1.83198	-1.20816	0.463708	-1.2189	-1.43125	0.760326	1.5385	-1.84112	2.0505	0.394835
T-complex protein 1 subunit alpha	Cytoplasm	TCP1	7	0	4	5	0	2	6	0	6	12.16	1.75398	-1.65399	0.527791	0.593291	-1.95939	-1.06614	-0.107832	-2.52052	0.593102	-1.2586
40S ribosomal protein S11	Cytoplasm	RPS11A	15	0	8	12	1	11	14	0	9	27.073	3.32025	-3.68244	0.269473	2.1889	-3.3624	4.17356	0.40152	-5.61168	-3.03792	2.06191
Phenylalanyl-tRNA synthetase alpha chain	Cytoplasm	FRS2	6	0	6	5	0	5	10	0	13	18.1778	-1.84221	-2.47253	0.809444	-1.58753	-2.92907	0.416477	0.869487	-3.76789	4.9173	0.118686
40S ribosomal protein S20	Cytoplasm	RPS20	10	1	13	12	3	12	13	3	12	28.5076	-2.29864	-2.87757	4.85984	1.66902	-1.59355	4.81183	-1.31905	-2.90904	-0.675795	6.56586
Homoserine dehydrogenase	Cytoplasm	HOM6	6	2	4	9	3	6	7	0	4	14.5552	-0.279353	0.0202186	-0.156142	3.72529	0.654657	2.32992	-0.310914	-3.01699	-2.47191	3.50133
60S ribosomal protein L13-A	Cytoplasm	RPL13A	12	1	12	18	5	13	15	1	9	31.0897	-1.41263	-3.22879	3.12252	6.73327	-0.00962738	5.16074	-0.616034	-5.44427	-4.82394	7.92902
Histidine biosynthesis trifunctional protein	Cytoplasm	HIS4	6	0	1	5	2	1	3	2	6	9.84975	1.75065	-1.33975	-1.81253	1.43051	0.412865	-1.48361	-1.94742	-0.0416523	1.62034	-1.4716
Phosphomannomutase	Cytoplasm	SEC53	7	0	6	8	2	6	8	1	10	18.1396	-0.825719	-2.46733	0.820358	1.42632	-0.922912	1.42611	-1.11131	-2.75996	1.9343	2.22014
NADPH dehydrogenase 2	Cytoplasm	OYE2	5	0	2	13	5	7	15	1	19	26.1999	-6.3031	-3.56369	-5.48123	3.50529	0.778285	0.393697	1.84005	-4.43071	7.35028	1.44327
Alanyl-tRNA synthetase, cytoplasmic	Cytoplasm	ALA1	8	4	6	5	1	14	4	0	12	18.5568	-0.00571806	1.47592	0.701221	-1.72488	-1.99014	9.32091	-5.32088	-3.84645	3.74878	7.96921
(DL)-glycerol-3-phosphatase 1	Cytoplasm	GPP1	16	10	17	12	3	15	14	5	15	36.4696	0.266375	5.03943	6.58632	-1.21639	-2.87652	5.80419	-4.31832	-2.55942	-1.21611	7.42172
40S ribosomal protein S0-B	Cytoplasm	RPS0B	18	3	13	23	6	20	18	5	18	44.3118	-1.11685	-3.02724	0.34705	6.94167	-1.14016	8.82681	-4.25733	-4.18493	-1.70308	9.82848
Lysyl-tRNA synthetase, cytoplasmic	Cytoplasm	KRS1	4	0	2	7	0	4	10	0	8	14.4222	-2.22198	-1.96169	-2.11817	1.77348	-2.32391	0.363452	2.75589	-2.98943	1.58722	-0.338547
Cofilin	Cytoplasm	COF1	2	0	1	5	0	4	0	0	1	4.41359	0.0959	-0.600333	-0.260275	3.40054	-0.711183	2.88711	-2.2169	-0.914849	-0.962491	3.30598
V-type proton ATPase subunit C	Cytoplasm	VMA5	1	0	1	1	0	1	2	0	2	3.22538	-0.391483	-0.438713	0.0790133	-0.168859	-0.51972	0.186722	0.379927	-0.668555	0.565846	0.0740084
60S ribosomal protein L22-A	Cytoplasm	RPL22A	10	0	8	11	0	9	13	0	4	21.1626	0.870113	-2.87851	1.95716	3.33081	-3.41002	3.66387	2.37027	-4.38657	-5.40986	2.8657
Cystathionine gamma-lyase	Cytoplasm	CYS3	16	0	13	21	2	12	19	16	18	42.4367	-2.30792	-5.7722	0.882459	5.62118	-4.83802	1.2996	-2.31551	7.20373	-0.869348	0.983847
Putative prolyl-tRNA synthetase YHR020W	Cytoplasm	YHR020W	2	0	4	3	0	3	11	0	9	13.3756	-3.77048	-1.81934	0.180666	-1.84726	-2.15528	-0.372664	4.28155	-2.7725	3.05256	-0.826358
Repressible alkaline phosphatase	Cytoplasm	PHO8	5	0	3	6	0	2	6	1	8	12.4706	-0.380018	-1.69624	-0.560896	1.48073	-2.00944	-1.14445	-0.263838	-1.5849	2.455	-0.895506
60S ribosomal protein L18	Cytoplasm	RPL18A	9	0	8	9	2	10	9	0	9	20.7948	0.0287495	-2.82849	2.06216	1.46407	-1.35077	4.75659	-1.44503	-4.31035	-0.246363	4.96199
40S ribosomal protein S13	Cytoplasm	RPS13	13	3	7	11	3	9	10	0	6	22.4451	3.31678	-0.0529673	0.590925	2.86601	-0.61669	3.34046	-1.27396	-4.65242	-3.98017	3.19509
40S ribosomal protein S10-A	Cytoplasm	RPS10A	10	0	9	3	0	4	0	0	3	10.3138	5.55046	-1.40287	6.05496	-0.737658	-1.66191	1.39938	-5.18051	-2.13784	-1.58599	2.23422
40S ribosomal protein S1-A	Cytoplasm	RPS1A	8	0	2	6	0	5	6	0	6	13.1392	2.33154	-1.78718	-1.75181	1.23844	-2.11717	1.68697	-0.59966	-2.72348	0.157716	-0.0879375
Coatomer subunit alpha	Cytoplasm	RET1	3	0	3	5	0	3	1	0	3	6.55553	0.171831	-0.891677	1.12811	2.62431	-1.05632	1.34702	-2.29278	-1.35883	0.0851028	2.46363
Peroxiredoxin TSA1	Cytoplasm	TSA1	13	1	10	18	9	17	9	4	8	29.7666	0.158169	-3.04883	1.50032	7.21274	4.20357	9.49436	-5.95147	-2.17002	-5.23564	11.9617
40S ribosomal protein S8	Cytoplasm	RPS8A	15	3	12	10	6	11	14	3	10	29.7706	2.15646	-1.04937	3.49919	-0.788695	1.20293	3.49336	-0.953458	-3.17084	-3.2374	3.85525
60S ribosomal protein L30	Cytoplasm	RPL30	6	0	5	7	0	12	7	0	7	16.2073	-0.992119	-2.20451	0.372096	1.12655	-2.61156	7.91333	-1.14077	-3.35945	-0.206539	6.2882
40S ribosomal protein S23	Cytoplasm	RPS23A	3	0	4	6	0	4	4	0	3	8.96249	-0.866571	-1.21907	1.44082	2.75204	-1.44417	1.74011	-0.501764	-1.85774	-0.985143	2.74495
60S ribosomal protein L24-B	Cytoplasm	RPL24B	5	0	3	8	0	3	9	0	3	12.5239	-0.403009	-1.70348	-0.576113	3.46142	-2.01803	-0.157888	2.70939	-2.59594	-2.5687	-0.210136
Eukaryotic translation initiation factor 5B	Cytoplasm	FUN12	3	0	2	1	0	1	4	0	3	5.82298	0.487867	-0.792036	0.337283	-1.11022	-0.938284	-0.468263	1.07518	-1.20699	0.41083	-1.08955
GTP-binding nuclear protein GSP1/CNR1	Cytoplasm	GSP1	3	0	2	6	3	5	5	0	5	10.5185	-1.53788	-1.43072	-1.0035	2.18814	1.3051	2.34775	-0.283351	-2.18028	0.322965	3.0692
Importin subunit beta-1	Cytoplasm	KAP95	2	0	3	7	0	4	1	0	1	6.21176	-0.679859	-0.844918	1.22627	4.74889	-1.00093	2.43371	-2.1201	-1.28757	-1.76204	4.11846
Uncharacterized protein YNL134C	Cytoplasm	YNL134C	6	0	3	8	1	1	7	0	10	14.7201	-0.350488	-2.00221	-1.20322	2.66553	-1.37191	-2.71166	-0.393735	-3.05117	3.45477	-1.50395
60S ribosomal protein L43	Cytoplasm	RPL43A	0	0	2	2	0	2	2	0	3	4.1387	-1.7855	-0.562941	0.818221	0.50016	-0.666887	0.95643	-0.0788231	-0.857867	1.15974	1.65029
60S ribosomal protein L23	Cytoplasm	RPL23A	5	0	5	10	0	5	13	0	6	17.6671	-2.62191	-2.40307	-0.0447434	3.59753	-2.84679	0.545237	4.12598	-3.66204	-1.85564	0.801308
Polyadenylate-binding protein, cytoplasmic and nuclear	Cytoplasm	PAB1	3	0	4	6	2	6	8	2	10	15.3253	-3.6116	-2.08453	-0.376046	0.446197	-0.469436	2.13573	0.302261	-1.17662	3.18565	2.48958
Elongation factor 1-beta	Cytoplasm	EFB1	6	0	5	11	1	6	13	1	3	17.7476	-1.65661	-2.41401	-0.067711	4.56838	-1.85975	1.52496	4.08558	-2.67871	-4.8914	1.55139
Aspartate aminotransferase, cytoplasmic	Cytoplasm	AAT2	3	4	2	5	5	1	7	2	3	10.5437	-1.54875	2.56585	-1.0107	1.17901	3.30104	-1.6586	1.70399	-0.185502	-1.68824	0.10372
Translationally-controlled tumor protein homolog	Cytoplasm	TMA19	3	0	4	7	2	6	10	3	7	15.5656	-3.71527	-2.11722	-0.444666	1.35911	-0.508159	2.07514	2.18155	-0.226436	0.078798	2.06918
60S ribosomal protein L21-A	Cytoplasm	RPL21A	10	0	9	12	1	11	11	0	13	25.4732	-0.98956	-3.46484	1.72629	2.76867	-3.10461	4.57695	-1.79491	-5.28007	1.67343	5.10573
60S ribosomal protein L16-A	Cytoplasm	RPL16A	5	0	5	3	0	4	7	0	2	10.0859	0.648768	-1.37188	2.12003	-0.655075	-1.62519	1.45684	1.93396	-2.0906	-2.48467	0.706957
Phospho-2-dehydro-3-deoxyheptonate aldolase, tyrosine-inhibited	Cytoplasm	ARO4	5	0	2	2	0	1	6	0	6	9.38673	0.950405	-1.27677	-0.680323	-1.4017	-1.51253	-1.36686	1.28514	-1.94568	1.82622	-2.49127
Zuotin	Cytoplasm	ZUO1	5	2	2	7	3	6	9	1	4	14.0397	-1.05699	0.0903276	-2.00896	1.91208	0.737711	2.45988	1.94798	-1.91015	-2.24273	1.9318
Diphosphomevalonate decarboxylase	Cytoplasm	ERG19	4	0	2	4	0	3	6	0	3	8.85046	0.181761	-1.20383	-0.527194	0.792644	-1.42612	0.76836	1.55451	-1.83452	-0.935329	-0.099471
Thioredoxin reductase 1	Cytoplasm	TRR1	4	0	2	1	0	4	5	0	4	7.95778	0.566877	-1.08241	-0.272296	-1.88386	-1.28227	1.99345	1.00289	-1.64949	0.461597	0.148546
Thioredoxin-1	Cytoplasm	TRX1	6	0	3	3	0	7	6	0	3	10.645	1.40755	-1.44793	-0.0396262	-0.857703	-1.71528	4.31586	0.653107	-2.2065	-1.73328	1.90646
S-adenosylmethionine synthetase 2	Cytoplasm	SAM2	3	0	4	7	2	4	8	3	5	13.1674	-2.68066	-1.79102	0.240117	2.22819	-0.121731	0.679834	1.38613	0.270656	-0.854862	1.48744
Peroxiredoxin type-2	Cytoplasm	AHP1	9	5	7	10	7	11	8	1	6	20.9807	-0.0514155	2.14623	1.0091	2.39673	3.61929	5.70973	-2.53837	-3.34887	-3.32899	7.56252
ATP phosphoribosyltransferase	Cytoplasm	HIS1	3	0	3	4	0	5	2	0	3	7.19973	-0.106085	-0.9793	0.944162	1.39086	-1.16013	3.18459	-1.61635	-1.49236	-0.201336	3.26424
40S ribosomal protein S29-A	Cytoplasm	RPS29A	5	0	2	5	0	4	5	0	2	8.94948	1.13904	-1.2173	-0.55547	1.75676	-1.44207	1.74339	0.504768	-1.85505	-1.97936	0.784118
60S ribosomal protein L33-B	Cytoplasm	RPL33B	5	0	8	12	3	6	6	3	7	17.5346	-2.56471	-2.38504	2.99311	5.64557	0.174574	1.57866	-2.80743	-0.634561	-0.796693	5.29586
60S ribosomal protein L32	Cytoplasm	RPL32	7	2	5	7	3	5	6	3	2	13.5255	1.16489	0.16028	1.13789	2.09845	0.820581	1.58956	-0.793696	0.196447	-4.01405	2.16154
Heat shock protein SSB2	Cytoplasm	SSB2	3	1	2	5	3	3	6	2	3	9.81542	-1.23454	-0.335084	-0.802733	1.44295	1.4184	0.525046	1.06982	-0.0345371	-1.3644	0.991817
Deoxyhypusine hydroxylase	Cytoplasm	LIA1	3	0	3	8	0	1	8	1	5	11.751	-2.06959	-1.59836	-0.355431	3.7415	-1.8935	-1.96301	2.09759	-1.43575	-0.225053	-0.763407
Low specificity L-threonine aldolase	Cytoplasm	GLY1	1	0	1	0	0	1	0	0	2	1.8584	0.198253	-0.252778	0.469344	-0.673475	-0.299453	0.531404	-0.933457	-0.385209	1.17367	0.485621
Adenosine kinase	Cytoplasm	ADO1	3	0	3	4	0	6	6	0	6	10.795	-1.65714	-1.46832	-0.082439	0.087962	-1.73944	3.27805	0.577797	-2.23758	1.20005	2.47016
D-lactate dehydrogenase [cytochrome] 3	Cytoplasm	DLD3	3	0	4	6	0	3	2	0	7	9.48435	-1.09171	-1.29005	1.2918	2.56293	-1.52826	0.608525	-2.76389	-1.96591	2.78281	2.45678
40S ribosomal protein S7-B	Cytoplasm	RPS7B	6	0	6	8	0	7	6	0	4	13.7583	0.0644387	-1.87139	2.0714	3.01407	-2.21694	3.53085	-0.910645	-2.85181	-2.11758	3.99543
40S ribosomal protein S31	Cytoplasm	UBI3	3	0	2	2	1	3	3	0	2	5.90387	0.452969	-0.803039	0.314185	-0.13953	0.0486819	1.51134	0.0345466	-1.22375	-0.625139	1.12577
Nascent polypeptide-associated complex subunit alpha	Cytoplasm	EGD2	3	0	3	3	0	3	5	1	3	8.04718	-0.471691	-1.09457	0.702177	0.0837468	-1.29668	0.970906	0.957985	-0.668018	-0.578154	0.532654
40S ribosomal protein S21-B	Cytoplasm	RPS21B	5	0	5	2	0	3	3	0	5	8.79614	1.20519	-1.19644	2.48831	-1.18767	-1.41736	0.782055	-1.41821	-1.82326	1.08882	0.893751
T-complex protein 1 subunit eta	Cytoplasm	CCT7	0	0	1	2	0	3	1	0	2	3.15836	-1.36257	-0.429598	0.0981484	0.855427	-0.508922	2.20362	-0.586413	-0.654665	0.595643	2.36797
Elongation factor 3B	Cytoplasm	HEF3	4	0	3	3	0	3	4	0	5	8.65832	0.264652	-1.1777	0.527669	-0.137727	-1.39516	0.816807	-0.348985	-1.79469	1.1501	0.524171
60S ribosomal protein L38	Cytoplasm	RPL38	2	0	2	3	0	3	3	0	3	6.11836	-0.639566	-0.832214	0.252939	0.78274	-0.98588	1.45726	-0.0731893	-1.26821	0.279489	1.43165
Heat shock protein STI1	Cytoplasm	STI1	1	0	1	3	0	6	3	0	5	7.04714	-2.04026	-0.958546	-1.01227	0.446155	-1.13554	4.22307	-0.539707	-1.46073	1.86651	3.38719
Small glutamine-rich tetratricopeptide repeat-containing protein 2	Cytoplasm	SGT2	6	0	5	10	1	3	5	5	6	14.7735	-0.373529	-2.00947	0.781525	4.64618	-1.38052	-0.725126	-2.42056	1.93776	-0.568979	0.873317
Adenine phosphoribosyltransferase 1	Cytoplasm	APT1	2	0	1	0	0	2	0	0	5	3.87591	0.327866	-0.527198	-0.106743	-1.40461	-0.624543	1.02269	-1.94683	-0.803398	3.27659	0.569183
Protein BMH2	Cytoplasm	BMH2	3	3	3	3	3	3	3	3	5	9.23792	-0.985395	1.74347	0.36217	-0.347769	1.51145	0.670663	-1.64011	1.08517	0.892389	1.68381
NADP-dependent alcohol dehydrogenase 6	Cytoplasm	ADH6	1	0	2	0	0	2	1	0	2	2.89839	-0.250414	-0.394236	1.17238	-1.05036	-0.46703	1.26917	-0.455829	-0.600777	0.711241	1.17855
Mitochondrial protein import protein MAS5	Mitochondria	YDJ1	3	0	4	7	0	2	3	3	6	10.2741	-1.43241	-1.39747	1.0663	3.27673	-1.65551	-0.590604	-2.16056	0.870393	1.43167	1.15783
Superoxide dismutase [Cu-Zn]	Cytoplasm	SOD1	4	0	2	4	1	3	3	1	3	7.71201	0.67291	-1.04898	-0.202116	1.20521	-0.242671	1.05542	-0.873659	-0.598542	-0.429119	0.918028
Dolichol-phosphate mannosyltransferase	Cytoplasm	DPM1	1	2	2	0	2	1	0	1	2	2.94553	-0.270754	1.59935	1.15892	-1.06745	1.52537	0.257284	-1.47951	0.38945	0.690277	1.31661
Phosphoserine phosphatase	Cytoplasm	SER2	1	0	1	5	0	6	0	0	2	4.93112	-1.12737	-0.670727	-0.408052	3.21299	-0.794575	4.75662	-2.47685	-1.02212	-0.192609	4.98995
	Variance		1455.4	161.516	647.051	1035.61	226.206	549.225	1949.55	359.977	1550.32	7602.56	42.6427	20.9057	26.2554	37.0941	28.5692	66.5522	30.679	33.692	45.9076	137.219
	Loadings		0.431417	0.136019	0.285544	0.362394	0.161135	0.25215	0.502289	0.20728	0.444647	1	-0.400041	0.0874944	0.338717	0.227233	0.258056	0.673634	-0.319421	-0.198823	-0.0633422	1
								Sum of variance			7934.85
								Cumulative contribution ratio			0.958123								Cumulative contribution ratio			0.975416
